# Supplementary material for: A novel core–shell bimetallic ZrAl-MOF simultaneously boosting electrostatic attraction and ion exchange to eliminate excessive fluoride
Source: Royal Society of Chemistry journal article supplement (doi:10.1039/d4re00452c), 2024-12-23
Supplement: d4re00452c1.pdf [file d4re00452c1.pdf]

**A novel core-shell bimetallic ZrAl-MOF simultaneously boosting electrostatic  
attraction and ion exchange to eliminate excessive fluoride**

Zhiwei Liu, Jingjing Wang, Qian Liu, Liying Wang\*, Zhenzhu Cao,  
Yongfeng Zhang

*College of Chemical Engineering, Inner Mongolia University of Technology, National and  
Local Joint Engineering Research Centre for High Value Utilization of Coal-based Solid Waste,  
Key Laboratory of Resource Circulation at Universities of Inner Mongolia Autonomous Region,  
Inner Mongolia Key Laboratory of Efficient Cyclic Utilization of Coal-Based Solid Waste, Hohhot  
010051, China*

\*Correspondence to: Liying Wang (E-mail:  
[wangliying7704@163.com](mailto:wangliying7704@163.com); [Wly2004@imut.edu.cn](mailto:Wly2004@imut.edu.cn))

Table S1 Fitted results by Langmuir model at different temperatures

| Temperature | Parameter |                         |                | Linear equation                                       |
|-------------|-----------|-------------------------|----------------|-------------------------------------------------------|
| (K)         | b         | q <sup>0</sup> (mg F/g) | R <sup>2</sup> | $\frac{C_e}{q_e} = \frac{C_e}{q^0} + \frac{1}{q^0 b}$ |
| 298k        | 0.4301    | 83.33                   | 0.9989         | Ce/qe=0.012Ce+0.0279                                  |
| 308k        | 0.1859    | 111.11                  | 0.9953         | Ce/qe=0.009Ce+0.04842                                 |
| 318k        | 0.2182    | 109.89                  | 0.9913         | Ce/qe=0.0091Ce+0.0417                                 |

Table S2 Fitted result by Freundlich model at different temperatures

| Temperature | Parameter |       |                | Linear equation                   |
|-------------|-----------|-------|----------------|-----------------------------------|
| (K)         | K         | 1/n   | R <sup>2</sup> | $lgqe = \frac{1}{n}lgCe + lgK$    |
| 298         | 41.59     | 0.175 | 0.8361         | lgqe=0.175lgC <sub>e</sub> +1.619 |
| 308         | 31.70     | 0.257 | 0.9736         | lgqe=0.257lgC <sub>e</sub> +1.501 |
| 318         | 42.76     | 0.291 | 0.9551         | lgqe=0.219lgC <sub>e</sub> +1.631 |

Table S3 Pseudo-first order and pseudo-second order kinetic models for fluoride removal

| Model     | k       | R <sup>2</sup> |
|-----------|---------|----------------|
| primary   | -0.0703 | 0.9206         |
| secondary | 0.01463 | 0.9994         |

Table S3 Comparison studies of ZrAl-MOF with reported adsorbent materials in literature.

| S.no | Name of the adsorbents                             | Adsorption capacity (mg g <sup>-1</sup> ) |
|------|----------------------------------------------------|-------------------------------------------|
| 1    | present study                                      | 109.2                                     |
| 2    | Alumina supported on carbon nanotubes <sup>1</sup> | 9.6                                       |
| 3    | Ce-TDC <sup>2</sup>                                | 94.9                                      |
| 4    | Zr-TDC <sup>2</sup>                                | 97.0                                      |
| 5    | (Ce)-UiO-66 <sup>3</sup>                           | 66.1                                      |
| 6    | Zr@Fu MOF composite <sup>4</sup>                   | 4.92                                      |
| 7    | La@Fu MOF composite <sup>4</sup>                   | 4.92                                      |
| 8    | Fe@Fu MOF composite <sup>4</sup>                   | 4.85                                      |
| 9    | Ce-Al bimetallic oxide <sup>5</sup>                | 146.73                                    |
| 10   | Ce@Fe1:1 <sup>6</sup>                              | 101.3                                     |
| 11   | Ce@Al1:1 <sup>6</sup>                              | 99.3                                      |
| 12   | Ce@La1:1 <sup>6</sup>                              | 90.9                                      |
| 13   | UiO-66 (Hf) <sup>7</sup>                           | 33.35                                     |
| 14   | Ce-MIL-96 <sup>8</sup>                             | 38.65                                     |
| 15   | Sn (II)-TMA MOFs <sup>9</sup>                      | 30.86                                     |

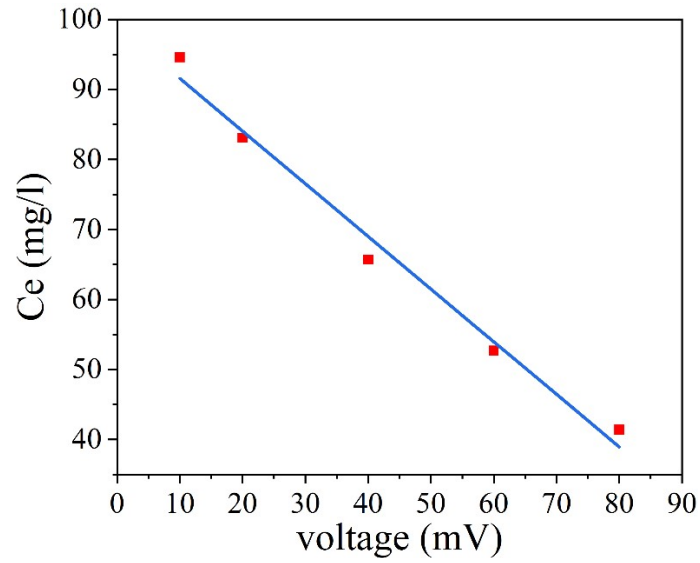

Fig.S1 Fluoride ion measurement standard curve

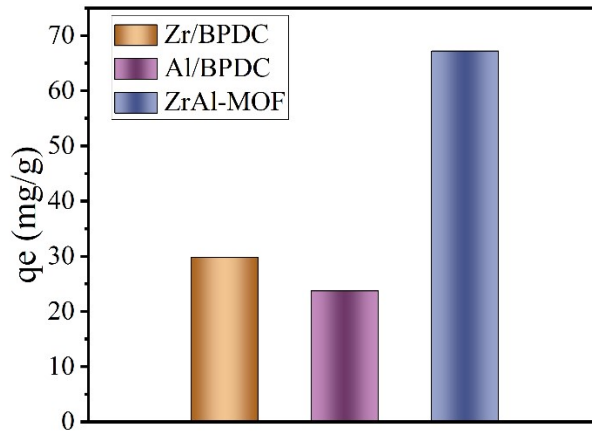

Fig.S2 Chart of Performance Comparison

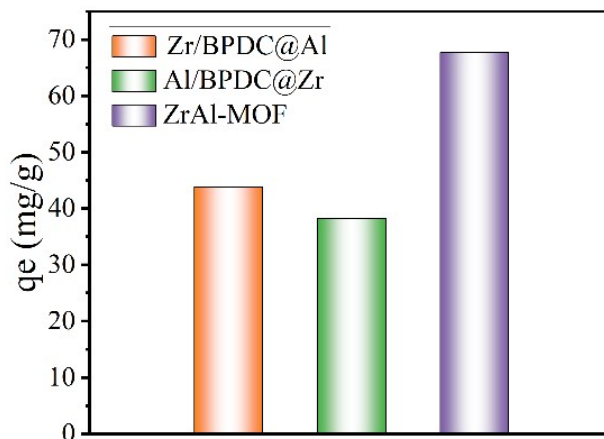

Fig.S3 Comparative performance graph of doped MOF

Validation of the optimized method

The limit of detection (LOD) and limit of quantification (LOQ) can be derived as 9.48  $\mu\text{g/l}$  and

31.6  $\mu\text{g/l}$ , respectively, based on the signal ratios ( $3 \times SD/S$ ) and ( $10 \times SD/S$ ). The results demonstrate that the method exhibits high sensitivity and reproducibility for both LOD and LOQ.<sup>10</sup>

#### Quality Assurance/Quality Control (QA/QC)

##### Quality assurance (QA) measures.

About the adsorbent: ZrAl-MOFs accurately measured the specific surface area and pore size distribution of the adsorbent using the nitrogen adsorption-desorption test (BET method). After several measurements and validations, the specific surface area of the selected adsorbent reached  $342 \text{ m}^2/\text{g}$  and the pore size distribution was concentrated at  $3.58 \text{ nm}$ , which provided sufficient sites and suitable channels for effective adsorption of fluoride ions. The size and shape of the adsorbent particles were analysed using a scanning electron microscope (SEM) to ensure that the particles were uniform in size and regular in shape, which is conducive to the formation of a stable adsorption environment in the adsorption device.

Fluoride ion solution: High-purity sodium fluoride ( $\geq 99\%$ ) was used as the raw material for the preparation of the fluoride ion solution, which was prepared on the basis of accurate weighing and volume adjustment.

Experimental apparatus and methods: The experimental apparatus was carefully selected to ensure that the material of the apparatus had good chemical compatibility with fluoride ions and adsorbents, the structure of the apparatus could meet the experimental requirements, and it was equipped with temperature control equipment and stirring equipment to ensure that the temperature control accuracy was within  $\pm 0.5^\circ\text{C}$ .

##### Quality control (QC) measures

Adsorption monitoring: For static adsorption experiments, the fluoride ion concentration in the adsorbed solution was measured at preset time intervals (every 10 minutes) using the ion-selective electrode method, and the amount of adsorption was calculated based on the change in concentration.

Data processing and analysis: Repeatability was performed to assess the quality of the data. In the repeatability test, three experiments were conducted under the same conditions, and the standard deviations of the key data were calculated, which indicated that the experimental data had good repeatability.

In addition, the experimental data were compared and analysed with common theoretical models of fluoride ion adsorption (e.g. Langmuir and Freundlich isotherm models), and the experimental data were consistent with the theoretical models within a reasonable error range, which further verified the reliability of the experimental results.

## References

1. Y. H. Li, S. Wang, X. Zhang, J. Wei, C. Xu, Z. Luan, D. Wu and B. Wei, *Environmental Technology*, 2008, **24**, 391-398.
2. Q. Huang, L. Zhao, G. Zhu, D. Chen, X. Ma, X. Yang and S. Wang, *Separation and Purification Technology*, 2022, **298**.
3. R. M. Rego, G. Sriram, K. V. Ajeya, H.-Y. Jung, M. D. Kurkuri and M. Kigga, *Journal of Hazardous Materials*, 2021, **416**.
4. A. Jeyaseelan, M. Naushad and N. Viswanathan, *Journal of Chemical & Engineering Data*, 2020, **65**, 2990-3001.
5. N. Musa, B. K. Allam, N. B. Singh and S. Banerjee, *Environmental Pollution*, 2023, **328**.
6. S. Sikha and B. Mandal, *ACS Applied Nano Materials*, 2024, **7**, 866-880.
7. X. Zhao, D. Liu, H. Huang, W. Zhang, Q. Yang and C. Zhong, *Microporous and Mesoporous Materials*, 2014, **185**, 72-78.
8. X. Yang, S. Deng, F. Peng and T. Luo, *Dalton Transactions*, 2017, **46**, 1996-2006.
9. A. Ghosh and G. Das, *New Journal of Chemistry*, 2020, **44**, 1354-1361.
10. P. S. Ghosal and A. K. Gupta, *RSC Advances*, 2015, **5**, 105889-105900.
